# Supplementary material for: Quake: quality-aware detection and correction of sequencing errors
Source: Springer Nature journal article supplement (doi:10.1186/gb-2010-11-11-r116), 2010-11-29

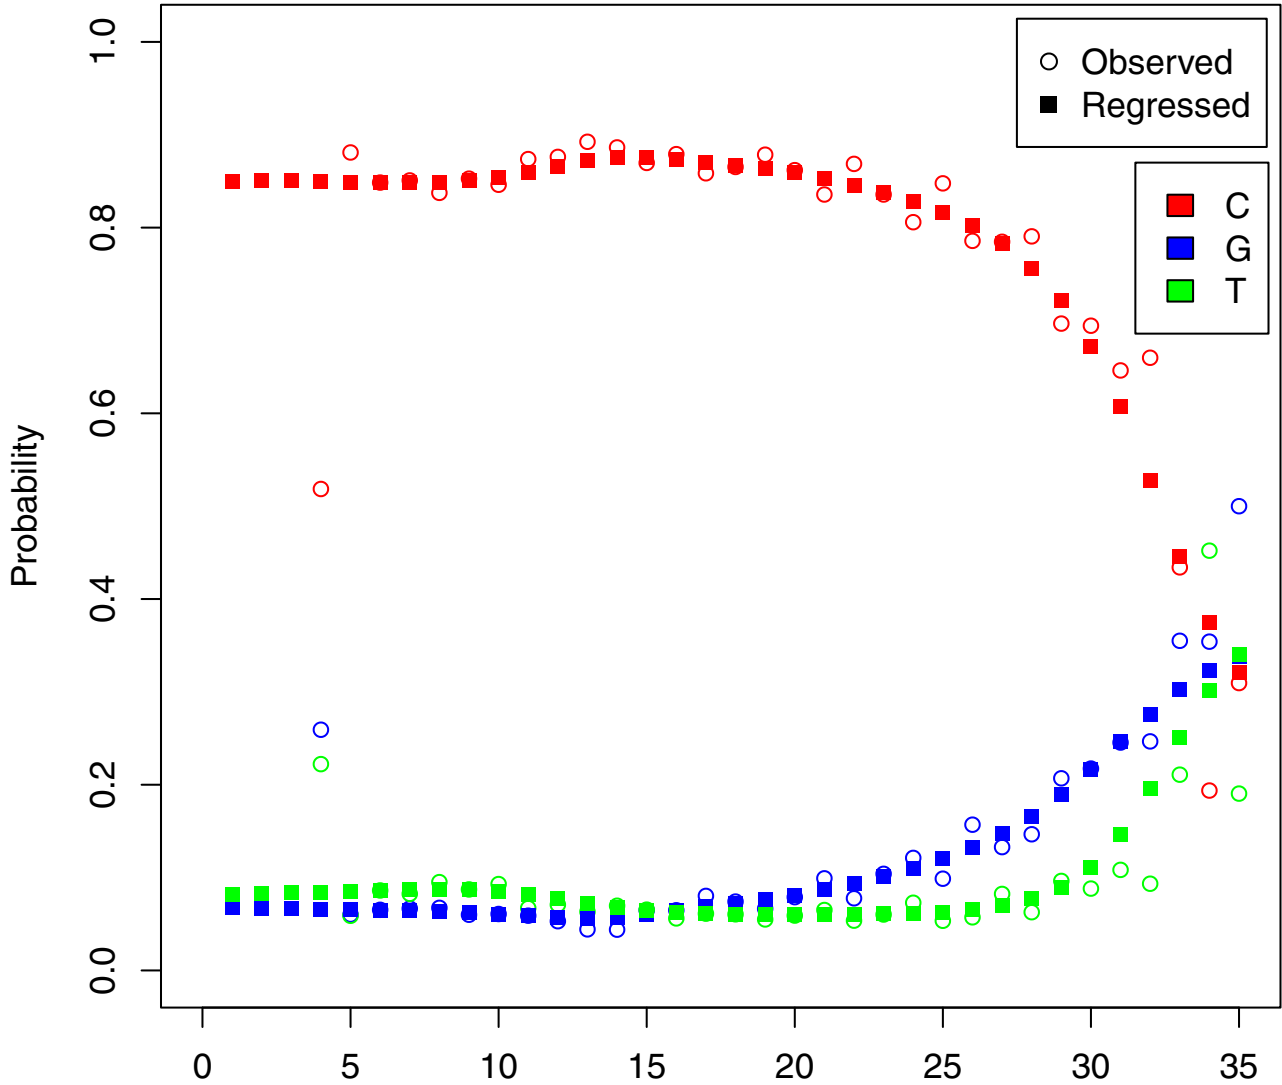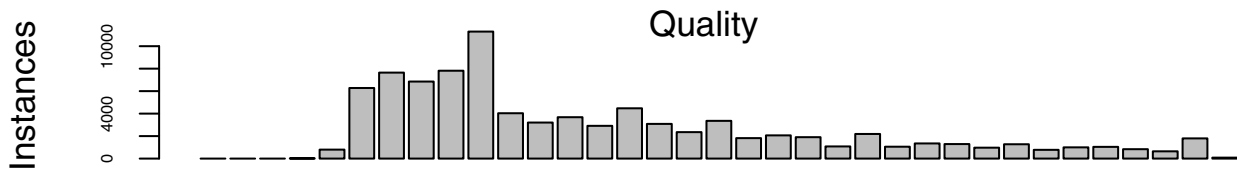

Supplement: 13059_2010_2492_MOESM2_ESM.pdf [file 13059_2010_2492_MOESM2_ESM.pdf]
