# Supplementary material for: Quake: quality-aware detection and correction of sequencing errors
Source: Springer Nature journal article supplement (doi:10.1186/gb-2010-11-11-r116), 2010-11-29
Supplement: 13059_2010_2492_MOESM5_ESM.pdf [file 13059_2010_2492_MOESM5_ESM.pdf]

```

1: function SEARCH ( $R$ )
2:    $P$ .PUSH( $\{\}$  , 1)
3:   while ( $C, L$ )  $\leftarrow$   $P$ .POP() do
4:     if VALID ( $R, C$ ) then
5:       return  $C$ 
6:     else
7:        $i \leftarrow$  lowest quality unconsidered position
8:       for  $nt \in [A, C, G, T]$  do
9:         if  $R[i] == nt$  then
10:           $C_{nt} = C$ 
11:        else
12:           $C_{nt} = C + (i, nt)$ 
13:           $L_{nt} \leftarrow$  LIKELIHOODRATIO ( $R, C_{nt}$ )
14:          if  $L_{nt} >$  likelihood_threshold then
15:             $P$ .PUSH( $C_{nt}, L_{nt}$ )
16:   return  $\{\}$ 

```
