# Supplementary material for: Quake: quality-aware detection and correction of sequencing errors
Source: Springer Nature journal article supplement (doi:10.1186/gb-2010-11-11-r116), 2010-11-29

observed read:

ACGTCCTAGTTA

quality:

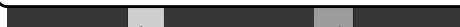

Likelihood

corrected reads:

ACGGCCTAGTTA

ACGCCCTAGTTA

ACGACCTAGTTA

ACGTCCTACTTA

ACGTCCTAATTA

actual read:

ACGGCCTACTTA

ACGTCCTATTTA

ACGGCCTAATTA

ACGGCCTATTTA

likelihood threshold:

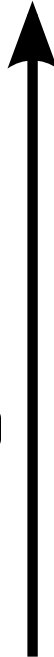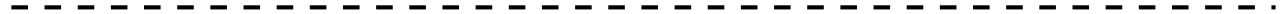

Supplement: 13059_2010_2492_MOESM6_ESM.pdf [file 13059_2010_2492_MOESM6_ESM.pdf]
